# Supplementary material for: Development of a Standardized Algorithm for Management of Newly Diagnosed Anorectal Malformations
Source: MDPI journal article supplement (doi:10.3390/children11040494), 2024-04-20
Supplement: s1 [file s1]

**Supplemental Table S1. Anorectal Malformation Severity.**

|          |                                      |
|----------|--------------------------------------|
| Mild     | Rectoperineal fistula                |
|          | Rectovestibular fistula              |
|          | H-type fistula                       |
|          | Anal stenosis                        |
|          | Rectal stenosis                      |
|          | Rectal atresia                       |
| Moderate | Cloaca (<3 cm)                       |
|          | Rectovaginal fistula                 |
| Severe   | Cloaca (>3 cm)                       |
|          | Posterior cloacal variant            |
|          | Rectovesical fistula                 |
|          | Cloacal exstrophy                    |
| Unknown  | Other                                |
|          | Unknown                              |
|          | No fistula                           |
|          | Rectourethral fistula, unknown level |
